1 Comparison of early effects of PCV7, PCV10 and PCV13 on *S. pneumoniae* (SP)  
2 nasopharyngeal carriage in a population based study; the Palestinian-Israeli Collaborative  
3 Research (PICR)

4 Rania Abu Seir<sup>1</sup>, Kifaya Azmi<sup>1</sup>, Ayob Hamdan<sup>2</sup>, Hanan Namouz<sup>3</sup>, Fuad Jaar<sup>4</sup>, Hanaa Jaber<sup>5</sup>,  
5 Carmit Rubin<sup>5</sup>, Dafna Doron<sup>3</sup>, Galia Rahav<sup>5,6</sup>, Ziad Abdeen<sup>1</sup> and Gili Regev-Yochay<sup>5,6\*</sup>

6 <sup>1</sup> Al-Quds University, Abu-Dis, Palestine

7 <sup>2</sup> Private Clinic, Nablus, Palestine

8 <sup>3</sup> Macabbi Healthcare Services, Jerusalem, Israel

9 <sup>4</sup> Private Clinic, Bethlehem, Palestine

10 <sup>5</sup> Sheba Medical Center, Ramat-Gan, Israel

11 <sup>6</sup> Sackler School of Medicine, Tel Aviv University, Tel Aviv, Israel

12

13 \*Corresponding Author: Gili Regev-Yochay, Infection Prevention & Control Unit, Sheba

14 Medical Center, Tel-Hashomer, Israel affiliated to the Sackler School of Medicine, Tel-Aviv

15 University.

16 Email: [gili.regev@sheba.health.gov.il](mailto:gili.regev@sheba.health.gov.il) (GRY)

17 **Keywords:** Pneumococcal conjugate vaccine, PCV7, PCV10, PCV13, pneumococcal carriage.

18 **Funding:** This work was supported by Maccabi Healthcare Services Research Institute

19 [MIHSR-250809] and the Israel National Institute for Health Policy Research (NIHP) [NIHP-

20 25-10] and MERC USAid [M-33-14]. All funding sources had no involvement in the study  
21 design, collection, analysis or interpretation of the data, nor did they have a role in writing the  
22 report or in the decision to submit the paper for publication.

## 23 **Abstract**

24 **Background:** Pneumococcal conjugate vaccines (PCVs), PCV10 and PCV13, are currently used  
25 in different countries. We have previously reported the effectiveness of PCV7, following its  
26 introduction in Israel and before PCVs were introduced in Palestine. Here, we extended the study  
27 and compared the initial impact of PCV10 to that of PCV7/13.

28 **Methods:** Four cross-sectional surveys of *S. pneumoniae* carriage among children <5y through  
29 2009-2014 were performed among two proximate populations, living under two distinct health  
30 authorities, with different vaccination policies. In East-Jerusalem (EJ), PCV7 was implemented  
31 in 2009 and replaced by PCV13 in late 2010, while in Palestine (PA), PCV10 was implemented  
32 in 2011.

33 **Results:** A total of 1267 and 2414 children from EJ and PA were screened. Implementation of  
34 both PCV7 (in EJ) and PCV10 (in PA) did not affect overall *S. pneumoniae* carriage (~30%),  
35 but resulted in a significant decrease in carriage of VT7 strains. In the pre-vaccine era,  
36 VT7/VT13 strains consisted 47.0%/62.0% and 41.2%/54.8% of pneumococci in EJ and PA,  
37 respectively. A 48.6% and 53.9% decrease was observed within 3 years of PCV7  
38 implementation in EJ ( $p=0.001$ ) and PCV10 in PA ( $p<0.0001$ ), respectively. These vaccination  
39 policies also resulted in ~50% reduction in VT13-added serotypes especially 6A (from 11.0% to  
40 0.0% (EJ) and 9.5% to 4.9% (PA)). Three years after PCV13 implementation in EJ, an  
41 additional 67% decrease in VT13 strains was observed, yet an increase in serotype 3 was  
42 observed (0.0% to 3.4%,  $p=0.056$ ). The prevalence of non-VT13 strains increased during the  
43 study period from 38% and 45.3% to 89.8% and 70.7%, in EJ and in PA respectively.

44 **Conclusions:** Within the first three years following PCV implementation, we observed similar  
45 reductions in carriage of VT10 and VT13 strains with either vaccination policies, with no effect  
46 on overall carriage. Further follow-up is needed to compare the long-term effects.

## 47 **Introduction**

48 Pneumococcal diseases cause high rates of morbidity and mortality worldwide causing bacterial  
49 meningitis, community-acquired pneumonia, acute otitis media, and sinusitis [1].

50 Nasopharyngeal (NP) colonization with *S. pneumoniae* is common in young children and serves  
51 as the source of transmission between individuals in the community and as the first step towards  
52 infection [2]. Moreover, understanding the dynamics of pneumococcal colonization following  
53 PCV implementation in children will lead to better understanding and possible prediction of the  
54 herd effects associated with PCV implementation [3]. The introduction of pneumococcal conjugate  
55 vaccine (PCV) to the routine childhood vaccination had a dramatic impact on the incidence of invasive  
56 pneumococcal disease (IPD) due to decrease in vaccine-type (VT) colonization and infections [4].

57 Currently two PCVs are in use in different countries; PCV10 is being used in several South American  
58 countries, Finland, the Netherlands and in Palestine, covering serotypes 1, 4, 5, 6B, 7F, 9V, 14, 18C, 19F  
59 and 23F. PCV13 is being used in the USA, most European countries, several African countries, Australia  
60 and Israel [5]. PCV13 covers all PCV10 serotypes and additionally, serotypes 3, 6A and 19A. Despite the  
61 greater number of serotypes covered by PCV13, it is still controversial whether its impact on carriage  
62 and disease are greater [6].

63 The Palestinian-Israeli Collaborative Research (PICR) group was established in 2009, by  
64 independent Palestinian and Israeli researchers, and offers a golden opportunity to study  
65 vaccination effects and impacts in the region, where two closely related Palestinian populations  
66 are governed by two distinct health authorities with different vaccination policies [7]. In this  
67 study, we compare the effects of sequential PCV7/PCV13 to PCV10 implementation on  
68 Palestinians living in East Jerusalem under Israeli health policy, vaccinated with PCV7/13 and  
69 Palestinians living in the West Bank, under the Palestinian Authority health policy, vaccinated  
70 with PCV10.

## 71 **Materials and methods**

### 72 **Ethical approvals**

73 The study was approved by the Institutional Review Boards (IRB) of Sheba Medical Center,  
74 Maccabi Healthcare Services (MHS) and Al-Quds University. The parent of each participating  
75 child provided a written informed consent before recruitment.

### 76 **PICR setting and study population**

77 A population based study consisting of repeated cross-sectional surveillances was conducted in  
78 two geographically proximate Palestinian populations which are under two different health  
79 authorities and consequently under different vaccination policies. This setting was previously  
80 described in detail [7]. In brief, Palestinian children (<5 years) and their accompanying parent  
81 who visited their primary care pediatrician, either from East Jerusalem (EJ), which is under  
82 Israeli Health Law, or from Palestinian cities in the West Bank governed by the Palestinian  
83 Authority (PA) were enrolled if the parent agreed and signed an informed consent.

### 84 **Vaccination policies in the two populations**

85 In Israel, PCV7 was approved for use and introduced to the private market in 2007 and to the  
86 pediatric national immunization program (NIP) in July 2009 in a 2+1 schedule with a 2 dose  
87 catch-up. In November 2010, PCV13 gradually replaced PCV7 without catch-up.

88 In Palestine, until 2011, access to PCV was very limited. In 2011, PCV10 was introduced  
89 through the Palestinian Ministry of Health to the pediatric NIP in a 2+1 schedule through  
90 primary care physicians. The vaccination was provided free of charge to all children under 2y by  
91 the Palestinian Ministry of Health.

92

## 93 **Study design and pneumococcal carriage screening**

94 Four cross-sectional surveillance studies were conducted during May-July of 2009-2011 and  
95 2014, results of three which have been previously reported [7]. The first surveillance, in 2009,  
96 served as a baseline, pre-vaccination surveillance for both populations, before PCV was  
97 introduced in either PA or EJ. The following two surveillances were conducted in the  
98 consecutive years (2010-2011) and allowed to evaluate the impact and effects of PCV7 [7]. This  
99 update of the study includes the fourth surveillance, conducted in 2014, three and a half years after  
100 PCV13 replaced PCV7 in EJ and three years after the introduction of PCV10 in PA. This  
101 surveillance provided the opportunity to assess the initial effects of PCV10 compared to PCV13.  
102 Children and their parents were screened for nasopharyngeal pneumococcal carriage as  
103 previously described [7]. In brief, medical history data, including vaccination history, were  
104 collected from the parents by a study coordinator and from the medical files by the physicians.  
105 Swabs were transferred to the laboratory within 24 hours, where pneumococci were identified  
106 and serotype was determined in two steps; initially latex agglutination test (Statens Serum  
107 Institute, Copenhagen, Denmark) was used to determine the serogroup, followed by PCR to  
108 determine the serotype.

## 109 **Statistical analysis**

110 Prevalence rates and proportions were calculated and compared using Chi-square or Fisher's  
111 exact test, as applicable. The Cochran-Armitage trend test was used to determine trends along the  
112 study years. Additionally, comparison of VT13 prevalence between the two regions before and  
113 after the implementation of the three different vaccines was applied using the Cochran-Mantel-  
114 Haenszel test. All statistical analyses were performed using SAS 9.4 for Unix.

115

116

## 117 **Results**

### 118 **Study population description**

119 A total of 1267 and 2414 children from EJ and PA were screened in the four surveillance studies  
120 [7]. Each year, approximately 300 children were screened in EJ and 600 children were screened  
121 in PA. A detailed description of the study population of the first three surveys (2009-2011) was  
122 previously reported [7, 8]. Here, we present an additional surveillance that took place in 2014 in  
123 which 287 children from EJ and 643 children from PA were screened. Population characteristics  
124 in this surveillance are similar to those in the 3 initial surveillances, with a slightly higher  
125 proportion of males (54% and 59% in EJ and PA), approximately, 45% of the children between 6  
126 and 24 months and >15% of the children living in large households with 7+ household members,  
127 in both regions (S1 **Table**).

### 128 **PCV coverage**

129 During the first year of the study, in the pre-vaccine period, when PCV7 was approved and  
130 available in the private market, but not yet implemented in the NIP, we found that only 2.7% and  
131 2.3% of the children in EJ and PA respectively received at least one dose of the vaccine, and  
132 only 1.2% in EJ and 0.7% in PA received at least two doses. Within a year of implementing  
133 PCV7 in EJ, the proportion of children <2 years old who received at least one vaccine dose  
134 increased to 75%. In PA, PCV10 was not introduced until late 2011, the proportion of children  
135 <2 years who received at least one dose of any PCV (PCV7 or PCV10) in PA before PCV10  
136 implementation did not exceed 13%. This proportion increased to 85.5% three years after



137 implementing PCV10 in the vaccination program compared to 92% of children in EJ (p=0.03)

138 **(Table 1).**

139

140 **Table1: Vaccine coverage in study population by year and region.**

| Variable                                 | EJ            |               |               |               | PA            |               |               |               |
|------------------------------------------|---------------|---------------|---------------|---------------|---------------|---------------|---------------|---------------|
|                                          | 2009<br>n (%) | 2010<br>n (%) | 2011<br>n (%) | 2014<br>n (%) | 2009<br>n (%) | 2010<br>n (%) | 2011<br>n (%) | 2014<br>n (%) |
| % vaccinated ≥1 dose                     | 9 (2.7)       | 173 (55.6)    | 228 (70.4)    | 267 (93.0)    | 14 (2.3)      | 35 (5.9)      | 61 (11.0)     | 513 (79.8)    |
| % vaccinated >2 doses                    | 4 (1.2)       | 124 (39.9)    | 196 (60.5)    | 238 (82.9)    | 4 (0.7)       | 13 (2.2)      | 35 (6.3)      | 431 (67.5)    |
| % of children <2years vaccinated ≥1 dose | 6 (3.7)       | 141 (75.0)    | 168 (85.7)    | 161 (92.0)    | 11 (2.5)      | 18 (4.0)      | 54 (13.0)     | 382 (85.5)    |
| % of vaccinated children >2yrs (≥1 dose) | 3 (1.7)       | 32 (26.0)     | 60 (46.9)     | 106 (94.6)    | 3 (1.6)       | 17 (11.6)     | 7 (5.1)       | 131 (66.8)    |

141

## 142 ***S. pneumoniae* carriage and serotypes' distribution**

143 Of all children screened, *S. pneumoniae* carriage was detected in 29.0% (100/345) of the

144 children in EJ and 36.0% (223/620) of children in PA in 2009 before PCV was introduced. This

145 carriage did not change significantly in EJ during the study period and ranged between 26.9%

146 and 30.7%. In PA, *S. pneumoniae* carriage decreased from 36.0% (223/620) to 28.8% (160/556)

147 ( $p_{\text{trend}}=0.0092$ ) during the first three study years (before PCV10 introduction), but did not

148 decrease further, three years after PCV10 was introduced (**Fig 1**). The overall *S. pneumoniae*

149 carriage among children during the whole study period was 28.9% in EJ and 31.8% in PA.

150 In the pre-vaccine study year, the proportion of VT strains among all pneumococcal isolates was

151 similar in the two populations, with VT7 strains constituting 47.0% of all isolates in EJ and

152 41.2% in PA (p=0.33). VT10-added serotypes (1, 5, and 7F) were rarely carried (3/1130) during

153 all years in both populations. Prior to vaccine introduction in 2009, VT13-added serotypes (3,

154 6A and 19A) constituted 14.0% (n=14) in EJ and 13.6% (n=30) in PA and non-VT13 serotypes  
155 constituted 38.0% (n=38) of all *S. pneumoniae* in that year in EJ and 45.3% (n=100) in PA.  
156 Since the VT10-added serotypes were very rarely carried, the impact on VT7 carriage was  
157 identical to that on VT10; therefore, we report only the impact on VT10 and VT13. During the  
158 first two years following PCV7 implementation in EJ, but not yet in PA, a significant decrease  
159 in VT10 strains was observed in EJ ( $p=0.0007$ ), while no change was observed in PA  
160 ( $p=0.8914$ ), as described previously [7].  
161 A further significant decrease in VT10 serotypes was observed three years after the introduction  
162 of PCV13 in EJ, with prevalence of VT10 strains decreasing to 5.7% (n=5) in 2014 ( $p=0.0006$ ).  
163 In PA, following introduction of PCV10 in 2011, the prevalence of VT10 serotypes significantly  
164 decreased from 41.9% (n=67) in 2011 to 19.0% (n=35) by 2014 ( $p<0.0001$ ) (**Fig 1**).  
165 Concurrently, carriage of non-VT13 serotypes, increased over the years after introducing  
166 PCV7/13 in EJ and they gradually replaced VT13 serotypes. In PA, carriage of non-VT13  
167 serotypes did not change before PCV10 introduction ( $p=0.2527$ ), but 3 years later the prevalence  
168 almost doubled, replacing VT13 serotypes ( $p<0.0001$ ) (**Fig 1**).  
169 When we assessed the rate of decrease in VT13 strains following the introduction of each of the  
170 three vaccine introductions, a similar 50% reduction was observed within 3 years of  
171 implementation of either PCV7 or PCV10 and an additional reduction of 67% in VT13 strains  
172 was observed after PCV13 introduction (**Table 2**). Overall, under the sequential PCV7/13 policy,  
173 VT13 strains decreased by 83.5% during the whole study period (from 62.0% to 10.2%) in EJ,  
174 but during the first two years following PCV7 implementation VT7 strains decreased by 48.7%  
175 (from 47.0% to 24.1%), and following PCV13 implementation, within 3.5 years VT13 strains  
176 decreased by another 67.1%. In PA, where PCV10 was implemented three years later, VT10

177 strains decreased by 54.7% (from 41.9% in 2011 to 19.0% in 2014) but interestingly the VT13-  
 178 added serotypes also decreased by 45% (p=0.0258), this decrease was attributed to the decrease  
 179 in serotype 6A (Table 2).

180 **Table 2: Proportion of VT13 decrease post PCV7/10/13 introduction**

|                                                                                                                            |    | 2009       | 2010       | 2011      | 2014      | Impact of PCV*                                                    | P-value |
|----------------------------------------------------------------------------------------------------------------------------|----|------------|------------|-----------|-----------|-------------------------------------------------------------------|---------|
| VT7                                                                                                                        |    |            |            |           |           |                                                                   |         |
| N(% of SP)                                                                                                                 | EJ | 47 (47.0)  | 24 (26.4)  | 21 (24.4) | 5 (5.7)   | -48.7%<br>(2009 to 11)                                            | <0.0001 |
| VT10                                                                                                                       |    |            |            |           |           |                                                                   |         |
| N(% of SP)                                                                                                                 | PA | 91 (41.2)  | 76 (38.4)  | 67 (41.9) | 35 (19.0) | -54.7%<br>(2011 to 14)                                            | <0.0001 |
| VT13                                                                                                                       |    |            |            |           |           |                                                                   |         |
| N(% of SP)                                                                                                                 | EJ | 62 (62.0)  | 32 (35.2)  | 27 (31.0) | 9 (10.2)  | -50.0%<br>PCV7<br>(2009 to 11)<br>-67.1%<br>PCV13<br>(2011 to 14) | <0.0001 |
|                                                                                                                            | PA | 121 (51.2) | 115 (58.1) | 97 (60.6) | 54 (29.4) | -51.5%<br>PCV10<br>(2011 to 14)                                   | <0.0001 |
| * Impact of PCV as calculated by the relative reduction in proportion of VT from pre-vaccine period to post-vaccine period |    |            |            |           |           |                                                                   |         |

181

## 182 Serotype distribution and replacement

183 While VT10 serotypes decreased significantly following implementation of any of the vaccines,  
 184 these were replaced by non-VT13 serotypes. In EJ, VT10 serotypes were nearly eliminated by  
 185 2014 with only a few isolates of serotypes 14, 23F, and 9V remaining. Yet, the group of VT13-  
 186 added serotypes (3, 6A and 19A) did not decrease significantly in EJ after the introduction of  
 187 PCV13 (p=0.536). The dynamics of each of these serotypes was different. Serotype 6A  
 188 decreased significantly, already following PCV7 introduction, and was completely eliminated  
 189 by 2014. Similarly, serotype 19A decreased somewhat (not statistically significant) following  
 190 PCV7, but no further decline was observed following PCV13 introduction. However, at the

191 same time serotype 3 increased from 0 cases in 2009 to 3/88 (3.4%) in 2014, although this  
192 increase was only nearly statistically significant ( $p=0.056$ ) (**Table 3**). In PA, before PCV10  
193 implementation, a relatively stable prevalence of VT10 and VT13-added serotypes was  
194 observed. Within three years following PCV10 implementation, a significant decrease in VT10,  
195 which was attributed to large decrease in serotypes 6B, 23F and 19F, was observed (from 30.0%  
196 from the carriage in 2009 to 9.2% in 2014). Interestingly, a decrease was also observed in the  
197 prevalence of two of the VT13-added serotypes: 6A (from 10.6% ( $n=17$ ) to 4.9% ( $n=9$ ),  
198  $p=0.045$ ) and 19A (from 3.8% ( $n=6$ ) to 1.6% ( $n=3$ ), though not statistically significant). The  
199 prevalence of serotype 3 did not change in this period (~4%).

200 **Table 3: Prevalence of *S. pneumoniae* serotypes in the two regions by year**

201

|                   | EJ                  |                     |                     |                    |                   | P-trend<br>2009-<br>2014 | PA                   |                      |                     |                     | P<br>2011-<br>2014 |
|-------------------|---------------------|---------------------|---------------------|--------------------|-------------------|--------------------------|----------------------|----------------------|---------------------|---------------------|--------------------|
|                   | 2009<br>N<br>%      | 2010<br>N<br>%      | 2011<br>N<br>%      | 2014<br>N<br>%     | 2009<br>N<br>%    |                          | 2010<br>N<br>%       | 2011<br>N<br>%       | 2014<br>N<br>%      |                     |                    |
| A. VT13 serotypes |                     |                     |                     |                    |                   |                          |                      |                      |                     |                     |                    |
| 19F               | 16<br>16.00         | 9<br>9.89           | 5<br>5.75           | 0<br>0.00          |                   |                          | 43<br>19.46          | 27<br>13.64          | 25<br>15.63         | 11<br>5.98          |                    |
| 14                | 9<br>9.00           | 4<br>4.40           | 3<br>3.45           | 2<br>2.27          | <b>&lt;0.0001</b> |                          | 19<br>8.60           | 9<br>4.55            | 13<br>8.13          | 13<br>7.07          | <b>0.0036</b>      |
| 6B                | 13<br>13.00         | 9<br>9.89           | 7<br>8.05           | 0<br>0.00          | <b>0.0320</b>     |                          | 8<br>3.62            | 14<br>7.07           | 8<br>5.00           | 2<br>1.09           | <b>0.0494</b>      |
| 23F               | 6<br>6.00           | 1<br>1.10           | 5<br>5.75           | 2<br>2.27          | 0.4348            |                          | 16<br>7.24           | 18<br>9.09           | 16<br>10.00         | 4<br>2.17           | <b>0.0020</b>      |
| 9V                | 1<br>1.00           | 0<br>0.00           | 1<br>1.15           | 1<br>1.14          | 0.7331            |                          | 4<br>1.81            | 6<br>3.03            | 2<br>1.25           | 3<br>1.63           | 1.0000             |
| 4                 | 0<br>0.00           | 0<br>0.00           | 0<br>0.00           | 0<br>0.00          |                   |                          | 1<br>0.45            | 1<br>0.51            | 0<br>0.00           | 2<br>1.09           | 0.5010             |
| 18C               | 2<br>2.00           | 1<br>1.10           | 0<br>0.00           | 0<br>0.00          | <b>0.0867</b>     |                          | 0<br>0.00            | 0<br>0.00            | 2<br>1.25           | 0<br>0.00           | 0.2156             |
| <b>Total VT7</b>  | <b>47<br/>47.00</b> | <b>24<br/>26.37</b> | <b>21<br/>24.14</b> | <b>5<br/>5.69</b>  | <b>&lt;.0001</b>  |                          | <b>91<br/>41.18</b>  | <b>75<br/>37.88</b>  | <b>66<br/>41.25</b> | <b>35<br/>19.02</b> | <b>&lt;.0001</b>   |
| 7F                | 0<br>0.00           | 0<br>0.00           | 0<br>0.00           | 0<br>0.00          |                   |                          | 0<br>0.00            | 1<br>0.51            | 0<br>0.00           | 0<br>0.00           |                    |
| 1                 | 0<br>0.00           | 0<br>0.00           | 0<br>0.00           | 0<br>0.00          |                   |                          | 0<br>0.00            | 0<br>0.00            | 0<br>0.00           | 0<br>0.00           |                    |
| 5                 | 1<br>1.00           | 0<br>0.00           | 0<br>0.00           | 0<br>0.00          | 0.1998            |                          | 0<br>0.00            | 0<br>0.00            | 1<br>0.63           | 0<br>0.00           | 0.4651             |
| <b>Total VT10</b> | <b>48<br/>48.00</b> | <b>24<br/>26.37</b> | <b>21<br/>24.14</b> | <b>5<br/>5.68</b>  | <b>&lt;.0001</b>  |                          | <b>91<br/>41.18</b>  | <b>76<br/>38.38</b>  | <b>67<br/>41.88</b> | <b>35<br/>19.02</b> | <b>&lt;.0001</b>   |
| 6A                | 11<br>11.00         | 5<br>5.49           | 4<br>4.60           | 0<br>0.00          | <b>0.0012</b>     |                          | 21<br>9.50           | 25<br>12.63          | 17<br>10.63         | 9<br>4.89           | <b>0.0448</b>      |
| 19A               | 3<br>3.00           | 2<br>2.20           | 1<br>1.15           | 1<br>1.14          | 0.2919            |                          | 5<br>2.26            | 9<br>4.55            | 6<br>3.75           | 3<br>1.63           | 0.3130             |
| 3                 | 0<br>0.00           | 1<br>1.10           | 1<br>1.15           | 3<br>3.41          | <b>0.0569</b>     |                          | 4<br>1.81            | 5<br>2.53            | 7<br>4.38           | 7<br>3.80           | 0.7893             |
| <b>Total VT13</b> | <b>62<br/>62.00</b> | <b>32<br/>35.16</b> | <b>27<br/>31.03</b> | <b>9<br/>10.23</b> | <b>&lt;.0001</b>  |                          | <b>121<br/>51.75</b> | <b>115<br/>58.08</b> | <b>97<br/>60.63</b> | <b>54<br/>29.35</b> | <b>&lt;.0001</b>   |

P-values presented include P-trend for EJ, from 2009-2014, and univariate p-value for pre- to post-vaccine period (2011-2014) for PA.

|                               | EJ           |              |              |              |                  | PA           |              |              |              |                  |
|-------------------------------|--------------|--------------|--------------|--------------|------------------|--------------|--------------|--------------|--------------|------------------|
|                               | 2009         | 2010         | 2011         | 2014         | P-trend          | 2009         | 2010         | 2011         | 2014         | P                |
|                               | N            | N            | N            | N            | 2009-2014        | N            | N            | N            | N            | 2011-2014        |
| <b>B. Non-VT13 serotypes*</b> |              |              |              |              |                  |              |              |              |              |                  |
| 11A/D                         | 3            | 5            | 4            | 13           |                  | 8            | 8            | 5            | 12           |                  |
|                               | 3.00         | 5.49         | 4.60         | 14.77        | <b>0.0036</b>    | 3.62         | 4.04         | 3.13         | 6.52         | 0.1471           |
| 19B/C                         | 0            | 0            | 4            | 7            |                  | 0            | 1            | 0            | 12           |                  |
|                               | 0.00         | 0.00         | 4.60         | 7.95         | <b>0.0004</b>    | 0.00         | 0.51         | 0.00         | 6.52         | <b>0.0005</b>    |
| 25/38                         | 0            | 3            | 1            | 5            |                  | 0            | 2            | 1            | 4            |                  |
|                               | 0.00         | 3.30         | 1.15         | 5.68         | <b>0.0366</b>    | 0.00         | 1.01         | 0.63         | 2.17         | 0.3775           |
| 35B                           | 4            | 2            | 7            | 5            |                  | 10           | 3            | 4            | 8            |                  |
|                               | 4.00         | 2.20         | 8.05         | 5.68         | 0.2859           | 4.52         | 1.52         | 2.50         | 4.35         | 0.3936           |
| 15B/C                         | 3            | 6            | 11           | 4            |                  | 15           | 7            | 5            | 6            |                  |
|                               | 3.00         | 6.59         | 12.64        | 4.55         | 0.3204           | 6.79         | 3.54         | 3.13         | 3.26         | 0.9430           |
| 10 A/B                        | 2            | 1            | 1            | 4            |                  | 4            | 5            | 1            | 6            |                  |
|                               | 2.00         | 1.10         | 1.15         | 4.55         | 0.2764           | 1.81         | 2.53         | 0.63         | 3.26         | 0.1276           |
| 12F                           | 0            | 1            | 0            | 3            |                  | 0            | 0            | 1            | 6            |                  |
|                               | 0.00         | 1.10         | 0.00         | 3.41         | <b>0.0603</b>    | 0.00         | 0.00         | 0.63         | 3.26         | 0.1276           |
| 22F                           | 0            | 0            | 0            | 3            |                  | 0            | 1            | 1            | 2            |                  |
|                               | 0.00         | 0.00         | 0.00         | 3.41         | <b>0.0166</b>    | 0.00         | 0.51         | 0.63         | 1.09         |                  |
| 23A                           | 1            | 3            | 2            | 3            |                  | 2            | 0            | 1            | 7            |                  |
|                               | 1.00         | 3.30         | 2.30         | 3.41         | 0.3711           | 0.90         | 0.00         | 0.63         | 3.80         | <b>0.0724</b>    |
| 15A/F                         | 1            | 7            | 1            | 3            |                  | 4            | 5            | 6            | 8            |                  |
|                               | 1.00         | 7.69         | 1.15         | 3.41         | 0.8646           | 1.81         | 2.53         | 3.75         | 4.35         | 0.7796           |
| 40                            | 0            | 0            | 0            | 2            |                  | 0            | 0            | 0            | 6            |                  |
|                               | 0.00         | 0.00         | 0.00         | 2.27         | <b>0.0508</b>    | 0.00         | 0.00         | 0.00         | 3.26         | <b>0.0322</b>    |
| 21                            | 0            | 0            | 0            | 2            |                  | 1            | 1            | 0            | 1            |                  |
|                               | 0.00         | 0.00         | 0.00         | 2.27         | <b>0.0508</b>    | 0.45         | 0.51         | 0.00         | 0.54         | 1.0000           |
| 9N/L                          | 0            | 0            | 2            | 2            |                  | 1            | 1            | 1            | 1            |                  |
|                               | 0.00         | 0.00         | 2.30         | 2.27         | <b>0.0603</b>    | 0.45         | 0.51         | 0.63         | 0.54         | 1.0000           |
| 6C                            | 0            | 4            | 3            | 2            |                  | 1            | 3            | 2            | 0            |                  |
|                               | 0.00         | 4.40         | 3.45         | 2.27         | 0.3711           | 0.45         | 1.52         | 1.25         | 0.00         | 0.2156           |
| 23B                           | 1            | 2            | 1            | 2            |                  | 2            | 1            | 2            | 7            |                  |
|                               | 1.00         | 2.20         | 1.15         | 2.27         | 0.6282           | 0.90         | 0.51         | 1.25         | 3.80         | 0.1836           |
| 17F                           | 4            | 4            | 4            | 0            |                  | 7            | 5            | 5            | 6            |                  |
|                               | 4.00         | 4.40         | 4.60         | 0.00         | 0.1646           | 3.17         | 2.53         | 3.13         | 3.26         | 0.9430           |
| 7B/C                          | 1            | 0            | 0            | 0            |                  | 0            | 1            | 0            | 5            |                  |
|                               | 1.00         | 0.00         | 0.00         | 0.00         | 0.1990           | 0.00         | 0.51         | 0.00         | 2.72         | <b>0.0637</b>    |
| <b>Total non-VT13</b>         | <b>38</b>    | <b>59</b>    | <b>60</b>    | <b>79</b>    |                  | <b>100</b>   | <b>83</b>    | <b>63</b>    | <b>130</b>   |                  |
|                               | <b>38.00</b> | <b>64.84</b> | <b>68.97</b> | <b>89.77</b> | <b>&lt;.0001</b> | <b>45.25</b> | <b>41.92</b> | <b>39.38</b> | <b>70.65</b> | <b>&lt;.0001</b> |

\*Included in the Table are non-VT13 serotypes that consisted of at least 4% of serotypes in any year or region, or if a change in proportion was observed (p<0.1).  
P-values presented include P-trend for EJ, from 2009-2014, and univariate p-value for pre- to post-vaccine period (2011-2014) for PA.

204 Non-VT13 serotypes gradually replaced VT13 serotypes; therefore, overall carriage of *S.*  
205 *pneumonia* did not change significantly in both regions. The proportion of non-VT13 strains  
206 increased from 38.0% of all isolates in pre-PCV surveillance in 2009, to 89.8% three years after  
207 the introduction of PCV13 in EJ ( $p < 0.001$ ). As for PA, the proportion of non-VT13 serotypes  
208 increased from 39.4% in the pre-PCV period (2011) to 70.7% in 2014 ( $p < 0.001$ ). **Table 3**  
209 presents the most common non-VT13 serotypes in both regions and their proportion among all  
210 isolates during the four surveillance periods, as well as p-values of the change pre- to post-  
211 vaccine periods. By 2014, serotypes 19B/C, 11A/D, 22F, 25/38, 40, 21, 9N/L and 12F emerged  
212 in EJ, while in PA, the non-VT13 serotypes that emerged 3 years following PCV10  
213 implementation were 19B/C, 40, 23A and 7B/C.

## 214 **Parental carriage**

215 *S. pneumoniae* carriage among the parents was relatively rare, with 3.8% ( $n=139/3681$ ) of  
216 parents detected as nasopharyngeal carriers in both regions. Overall, 18.3% ( $n=23$ ) of parent  
217 strains belonged to VT10 serotypes in both regions. Serotypes 14, 19F and 23F constituted the  
218 majority of VT10 serotypes (73.9%,  $n=17$ ). Parental strains that belonged to non-VT13 serotypes  
219 constituted 67.5% ( $n=27$ ) and 72.1% ( $n=62$ ) in EJ and PA, respectively (**Table 4**). The small  
220 sample size of parental strains did not allow us to assess PCV effect on parental carriage or strain  
221 distribution. Sixty percent of the parents who were carriers, had a child who was also a  
222 pneumococcal carrier, yet, only 42.7% of those parent-child co-carrier pairs had an identical  
223 serotype on screening. In both regions, once PCV was implemented, none of the VT13 carrier  
224 parents had a child who carried a VT13 strain.

225

226

227 **Table 4: *S. pneumoniae* carriage among parents.**

|                                                                                                                                                      | EJ<br>n (%)   | PA<br>n (%)   |
|------------------------------------------------------------------------------------------------------------------------------------------------------|---------------|---------------|
| Parent carriage                                                                                                                                      | 48/1267 (3.8) | 91/2414 (3.8) |
| Strains available for serotyping                                                                                                                     | 40            | 86            |
| VT7                                                                                                                                                  | 7/40 (17.5)   | 15/86 (17.4)  |
| VT10                                                                                                                                                 | 7/40 (17.5)   | 16/86 (18.6)  |
| VT13                                                                                                                                                 | 13/40 (32.5)  | 24/86 (27.9)  |
| Non-VT13                                                                                                                                             | 27/40 (67.5)  | 62/86 (72.1)  |
| Child co-carrier of <i>S. pneumoniae</i>                                                                                                             | 31/40 (77.5)  | 55/86 (64.0)  |
| Child co-carrier of same serotype                                                                                                                    | 13/40 (32.5)  | 19/86 (22.1)  |
| Among VT13 carrier parents                                                                                                                           | (n=13)        | (n=24)        |
| Child co-carrier of <i>S. pneumoniae</i>                                                                                                             | 6/13 (46.2)   | 14/24 (58.3)  |
| Child co-carrier of same serotype                                                                                                                    | 2/13 (15.4)   | 6/24 (25.0)   |
| Pre-vaccine period*                                                                                                                                  | 2/2 (100.0)   | 6/12 (50.0)   |
| Post-vaccine period*                                                                                                                                 | 0/4 (0.0)     | 0/2 (0.0)     |
| Among non-VT13 carrier parents                                                                                                                       | n=27          | n=62          |
| Child co-carrier of <i>S. pneumoniae</i>                                                                                                             | 15/27 (55.6)  | 41/62 (66.1)  |
| Child co-carrier of same serotype                                                                                                                    | 11/27 (40.7)  | 13/62 (21.0)  |
| * Pre-vaccine period in EJ included data from 2009 and in PA from 2009-11. Post-vaccine period in EJ included data from 2010-14 and in PA from 2014. |               |               |

228

## 229 Discussion

230 We have previously reported the effects of PCV7 by comparing two closely related populations  
 231 in which PCV7 was implemented in one but not yet in the other [7]. In this study, we conducted  
 232 an additional surveillance following the introduction of PCV10 to the previously unvaccinated  
 233 population. This allowed us to assess the impact of different PCVs on pneumococcal carriage  
 234 among children and their parents and the effects of the different vaccination programs. To  
 235 overcome seasonal variability, all surveillances took place during spring-summer. This could  
 236 explain the relatively low carriage rates on one hand, but assured that the changes observed were  
 237 not confounded by seasonality.



238 The main vaccine impact of PCV implementation was the significant decrease in VT serotypes.  
239 More so, we show that a reduction of ~50% in VT13 serotypes was observed within three years  
240 of implementation of PCV, whether PCV7 or PCV10 were used. This reduction was similar,  
241 despite slightly different vaccine coverage rates (with 85% vaccine coverage of <2y in PA vs.  
242 92% coverage in EJ). Comparing the impact of PCV13 is only partially accurate, since PCV13  
243 was introduced after a significant impact of PCV7 was observed. Yet, an additional 67%  
244 decrease in VT13 was observed 3 years after PCV13 replaced PCV7.

245 There is controversy over the advantage of PCV13 compared to PCV10. While some studies  
246 reported higher effectiveness and cost-effectiveness of PCV13 compared to PCV10 [9-11] due to  
247 its greater coverage, one study reported 97% effectiveness against VT-IPD for PCV10, with only  
248 86% effectiveness for PCV13 [12] and other studies [13-15] showed no differences between  
249 them. The disparities in results of different studies, particularly regarding the effect on 19A,  
250 which was shown to emerge following PCV10 in some studies but decrease, in other studies,  
251 could be attributed to differences in the study design, different outcomes assessed (carriage, IPD,  
252 etc.), or different vaccine coverage. Alternatively, the differences could be due to differences in  
253 background circulating clones in the different geographic regions.

254 Particularly interesting is the comparison of the impact of the different PCVs on serotypes  
255 covered by one vaccine, but not the other (serotypes 3, 6A and 19A). Serotype 6A has been  
256 repeatedly reported to decrease following PCV7 or PCV10 implementation [14, 16-20], probably  
257 due to cross-protection by 6B in PCV7/PCV10. Serotype 19A, which is not included in either  
258 PCV7 or PCV10, could similarly be cross-protected by 19F which is included in both these  
259 vaccines. However, only modest protection has been suggested [21]. Moreover, PCV7  
260 introduction in many countries, led to emergence of serotype 19A both in carriage and in IPD

261 [22-24], yet, we did not observe emergence of 19A in EJ after PCV7 and before PCV13 was  
262 implemented. Similarly a nationwide IPD surveillance study in Israel did not report 19A increase  
263 following PCV7 introduction among children or adults [25, 26]. A plausible explanation could  
264 be the rapid transition from PCV7 to PCV13 within less than 2 years in Israel, or a different  
265 clonal background distribution.

266 In contrast to PCV7, the impact of PCV10 on serotype 19A is much more controversial. Several  
267 studies reported PCV10 effectiveness against serotype 19A [12, 13, 27], while other studies  
268 reported emergence of serotype 19A following PCV10 introduction [14, 28-31]. Here, we report  
269 that serotype 19A did not emerge, or rather tended to decrease following PCV10 implementation  
270 in PA. However, it is important to note that these are only short-term (three years) observations,  
271 and longer follow-up is required to determine the long-term impact of PCV10 on serotype 19A.

272 The last of the three additional serotypes not included in PCV10 is serotype 3. Serotype 3 is  
273 unique in many aspects, heavily encapsulated with a mucoid phenotype, highly resistant to  
274 phagocytosis. While some have suggested that despite this it is not invasive [32], others have  
275 reported it to be highly invasive, with high case fatality ratios, particularly in adults [33, 34].

276 Many studies from different geographical regions have reported ineffectiveness of PCV13  
277 against serotype 3 [14, 35-38], although a few have reported decrease in serotype 3 following  
278 PCV13 implementation [39, 40]. We show a nearly significant increase in serotype 3 following  
279 PCV13 implementation in EJ ( $p=0.056$ ) and no change after PCV10 implementation in PA.

280 Whether serotype 3 will eventually decrease in a longer follow-up is yet to be seen.

281 The relatively stable prevalence of *S. pneumoniae* carriage despite the significant reduction in  
282 VT strains is attributed to the replacement by non-VT strains as previously described [41-45].

283 Serotype replacement is a universal phenomenon in which non-VT serotypes emerge and replace

284 VT serotypes with geographic variability [42]. The emerging serotypes we observed following  
285 the two different vaccination policies were somewhat similar.

286 In EJ, the most notable emerging non-VT serotypes were 11A/D, 19B/C, 25/38, 40, 21, 9N/L  
287 and 12F and in PA they were 19B/C, 40, 23A and 7B/C. A study in Massachusetts, USA  
288 reported that several years following PCV7 implementation, serotypes 19A, 6A, 15B/C, 35B,  
289 and 11A emerged [46]. In Northern Japan, serotypes 15A, 23A, 11A, 10A and 35B accounted for  
290 the majority of non-VT13 serotypes after the introduction of PCV13 [47]. Serotype 6C was  
291 shown to decline following PCV13 implementation but not PCV7 or PCV10 [19, 38, 48, 49].  
292 Interestingly, we observed emergence of 6C following PCV7 implementation, but a decrease  
293 after either PCV13 or PCV10 implementation.

294 Parental nasopharyngeal pneumococcal carriage was rare in our population. Carriage rates in  
295 adults were reported to be less than 10%, but higher rates were found among adults with children  
296 at home [50]. An explanation of the relatively low carriage rates we detected could be that we  
297 determined carriage via nasopharyngeal swabbing, while recent reports suggested higher yield in  
298 adults when swabbing both pharynx and nasopharynx or adding salivary testing [51-53].

299 While sixty percent of the carrier parents had a carrier child, only 42.7% of those parent-child  
300 co-carrier pairs had an identical serotype. Similar dis-concordance was previously reported  
301 among adults in Israel, where intra-familial transmission could not be demonstrated [54].

302 Children were shown to carry pneumococcal strains for months, while adults typically carry  
303 pneumococci for only very short durations [55]. Yet, this does not essentially explain the relative  
304 dis-concordance of serotypes between children and their parents. The difference between  
305 serotypes carried by children's and their parents' could be due to the difference of the direct PCV

306 impact and the indirect (herd effect) impact, on their parents, particularly the potential time lag  
307 of the effects.

308 Our study has a few limitations, mainly due to its design as an observational study. First,  
309 vaccination policies were implemented at different times, PCV7/13 in 2009/2010 in EJ, and  
310 PCV10 in 2011 in PA. Second, while the two compared populations are closely related, they  
311 differed in several variables that were adjusted for. Third, the overall carriage in the children was  
312 relatively low, probably due to the 'off season' periods we chose, i.e. spring and summer, when  
313 carriage of pneumococci is lower. This was intentional in order to overcome seasonal variability,  
314 but limited the power to detect some differences. Last, this study only reports the short-term  
315 impact of the vaccines and to assess the long-term differences between the vaccines, longer  
316 follow-up is needed.

317 In conclusion, the unique settings of this study allowed us compare the initial effects of PCV13  
318 and PCV10 in two closely related populations that live in two geographically proximate regions,  
319 under two different health authorities. Despite the short follow-up interval after implementation  
320 of either PCV13 in EJ or PCV10 in PA, a dramatic decrease in the VT13 serotypes (including  
321 serotypes 6A and 19A but not serotype 3) was observed. Replacement by non-VT13 was also  
322 observed in both populations regardless of the vaccination used. Longer follow-up is needed to  
323 compare the long-term effects.

## 324 **Acknowledgments**

325 We would like to acknowledge the late Dr. Raz for taking part in establishing the PICR group.  
326 We would also like to thank Efrat Steinberger, Mulu Tiruneh, Muayyad Ghoul and Miriam  
327 Varon for coordinating the study, Aylana Reiss-Mandel, Melody Kasher, Mahmoud Ramlawi,  
328 and Julie Lowenthal for assisting in the laboratory.

329 The PICR members 2014: PI: Dr. Gili Regev-Yochay, Co-PI: Prof. Ziad Abdeen, Izzeldin  
330 Abullaish, Rania Abu Seir, Muhammed Affiffi, Kifaya Azmi, Yunes Bassem, Adi Cohen,  
331 Muhannad Daana, Ibrahim Dandis, Dafna Doron, Abedalla ElHamdany, Ayob Hamdan,  
332 Samantha Hasselton, Amit Hupert, Muhammed Hussein, Fuad Jaar, Laduyeh Kawather, Galia  
333 Rahav, Meir Raz, Avraham Rodity, Hector Roizin, Waeel Siag, Ora Stern, Amin Thalji, Luba  
334 Yakirevitch, Khairi Zecayra.

335

## 336 **Figures' legends**

337 **Fig 1. Proportion of VT strains' carriage among all *S. pneumoniae* isolates in the two populations.**

338 (A) In EJ. (B) In PA. Dark grey represents the proportion of VT10 strains among all isolates. Stripes  
339 represent the proportion of carriage of 6A serotype. White represents the proportion of carriage of 19A  
340 serotype. Black represents the proportion of carriage of serotype 3, and Light grey represents the  
341 proportion of carriage of non-VT13 serotypes.

342

## 343 **Supporting information**

344 **S1 Table:** Characteristics of the two study populations in each of the four screening periods.

345

## 346 **References**

- 347 1. Black RE, Cousens S, Johnson HL, Lawn JE, Rudan I, Bassani DG, et al. Global, regional,  
348 and national causes of child mortality in 2008: a systematic analysis. *Lancet*. 2010 Jun  
349 05;375(9730):1969-87.
- 350 2. Bogaert D, De Groot R, Hermans PW. *Streptococcus pneumoniae* colonisation: the key to  
351 pneumococcal disease. *The Lancet Infectious diseases*. 2004 Mar;4(3):144-54.
- 352 3. Lynch JP, 3rd, Zhanell GG. *Streptococcus pneumoniae*: epidemiology, risk factors, and  
353 strategies for prevention. *Seminars in respiratory and critical care medicine*. 2009  
354 Apr;30(2):189-209.
- 355 4. Simell B, Auranen K, Kayhty H, Goldblatt D, Dagan R, O'Brien KL, et al. The  
356 fundamental link between pneumococcal carriage and disease. *Expert review of vaccines*.  
357 2012 Jul;11(7):841-55.
- 358 5. (IVAC) IVAC, Health JHBSoP. [8 August 2018]. Available from: [www.view-hub.org](http://www.view-hub.org).
- 359 6. Pittet LF, Posfay-Barbe KM. Pneumococcal vaccines for children: a global public health  
360 priority. *Clinical microbiology and infection : the official publication of the European*  
361 *Society of Clinical Microbiology and Infectious Diseases*. 2012 Oct;18 Suppl 5:25-36.
- 362 7. Daana M, Rahav G, Hamdan A, Thalji A, Jaar F, Abdeen Z, et al. Measuring the effects of  
363 pneumococcal conjugate vaccine (PCV7) on *Streptococcus pneumoniae* carriage and  
364 antibiotic resistance: the Palestinian-Israeli Collaborative Research (PICR). *Vaccine*. 2015  
365 Feb 18;33(8):1021-6.
- 366 8. Regev-Yochay G, Jaber H, Hamdan A, Daana M, Nammouz H, Thalji A, et al. Vaccine  
367 escape of piliated *Streptococcus pneumoniae* strains. *Vaccine*. 2016 May 27;34(25):2787-  
368 92.
- 369 9. Earnshaw SR, McDade CL, Zanotti G, Farkouh RA, Strutton D. Cost-effectiveness of 2 +  
370 1 dosing of 13-valent and 10-valent pneumococcal conjugate vaccines in Canada. *BMC*  
371 *infectious diseases*. 2012 Apr 24;12:101.
- 372 10. Klok RM, Lindkvist RM, Ekelund M, Farkouh RA, Strutton DR. Cost-effectiveness of a  
373 10- versus 13-valent pneumococcal conjugate vaccine in Denmark and Sweden. *Clinical*  
374 *therapeutics*. 2013 Feb;35(2):119-34.
- 375 11. Haasis MA, Ceria JA, Kulpeng W, Teerawattananon Y, Alejandria M. Do Pneumococcal  
376 Conjugate Vaccines Represent Good Value for Money in a Lower-Middle Income  
377 Country? A Cost-Utility Analysis in the Philippines. *PloS one*. 2015;10(7):e0131156.

- 378 12. Deceuninck G, De Serres G, Boulianne N, Lefebvre B, De Wals P. Effectiveness of three  
379 pneumococcal conjugate vaccines to prevent invasive pneumococcal disease in Quebec,  
380 Canada. *Vaccine*. 2015 May 28;33(23):2684-9.
- 381 13. Domingues CM, Verani JR, Montenegro Renoier EI, de Cunto Brandileone MC, Flannery  
382 B, de Oliveira LH, et al. Effectiveness of ten-valent pneumococcal conjugate vaccine  
383 against invasive pneumococcal disease in Brazil: a matched case-control study. *The Lancet*  
384 *Respiratory medicine*. 2014 Jun;2(6):464-71.
- 385 14. Naucler P, Galanis I, Morfeldt E, Darenberg J, Ortqvist A, Henriques-Normark B.  
386 Comparison of the Impact of Pneumococcal Conjugate Vaccine 10 or Pneumococcal  
387 Conjugate Vaccine 13 on Invasive Pneumococcal Disease in Equivalent Populations.  
388 *Clinical infectious diseases : an official publication of the Infectious Diseases Society of*  
389 *America*. 2017 Nov 13;65(11):1780-9.
- 390 15. Alicino C, Paganino C, Orsi A, Astengo M, Trucchi C, Icardi G, et al. The impact of 10-  
391 valent and 13-valent pneumococcal conjugate vaccines on hospitalization for pneumonia in  
392 children: A systematic review and meta-analysis. *Vaccine*. 2017 Oct 13;35(43):5776-85.
- 393 16. Whitney CG, Pilishvili T, Farley MM, Schaffner W, Craig AS, Lynfield R, et al.  
394 Effectiveness of seven-valent pneumococcal conjugate vaccine against invasive  
395 pneumococcal disease: a matched case-control study. *Lancet*. 2006 Oct  
396 28;368(9546):1495-502.
- 397 17. Vesikari T, Wysocki J, Chevallier B, Karvonen A, Czajka H, Arsene JP, et al.  
398 Immunogenicity of the 10-valent pneumococcal non-typeable *Haemophilus influenzae*  
399 protein D conjugate vaccine (PHiD-CV) compared to the licensed 7vCRM vaccine. *The*  
400 *Pediatric infectious disease journal*. 2009 Apr;28(4 Suppl):S66-76.
- 401 18. Park IH, Moore MR, Treanor JJ, Pelton SI, Pilishvili T, Beall B, et al. Differential effects  
402 of pneumococcal vaccines against serotypes 6A and 6C. *The Journal of infectious diseases*.  
403 2008 Dec 15;198(12):1818-22.
- 404 19. Lee H, Cha JH, Nahm MH, Burton RL, Kim KH. The 7-valent pneumococcal conjugate  
405 vaccine elicits cross-functional opsonophagocytic killing responses to *Streptococcus*  
406 *pneumoniae* serotype 6D in children. *BMC infectious diseases*. 2013 Oct 10;13:474.
- 407 20. Grant LR, O'Brien SE, Burbidge P, Haston M, Zancolli M, Cowell L, et al. Comparative  
408 immunogenicity of 7 and 13-valent pneumococcal conjugate vaccines and the development  
409 of functional antibodies to cross-reactive serotypes. *PloS one*. 2013;8(9):e74906.
- 410 21. Hausdorff WP, Hoet B, Schuerman L. Do pneumococcal conjugate vaccines provide any  
411 cross-protection against serotype 19A? *BMC pediatrics*. 2010 Feb 2;10:4.
- 412 22. Pelton SI, Huot H, Finkelstein JA, Bishop CJ, Hsu KK, Kellenberg J, et al. Emergence of  
413 19A as virulent and multidrug resistant *Pneumococcus* in Massachusetts following

- 414 universal immunization of infants with pneumococcal conjugate vaccine. *The Pediatric*  
415 *infectious disease journal*. 2007 Jun;26(6):468-72.
- 416 23. Moore MR, Gertz RE, Jr., Woodbury RL, Barkocy-Gallagher GA, Schaffner W, Lexau C,  
417 et al. Population snapshot of emergent *Streptococcus pneumoniae* serotype 19A in the  
418 United States, 2005. *The Journal of infectious diseases*. 2008 Apr 01;197(7):1016-27.
- 419 24. Kyaw MH, Lynfield R, Schaffner W, Craig AS, Hadler J, Reingold A, et al. Effect of  
420 introduction of the pneumococcal conjugate vaccine on drug-resistant *Streptococcus*  
421 *pneumoniae*. *The New England journal of medicine*. 2006 Apr 06;354(14):1455-63.
- 422 25. Regev-Yochay G, Katzir M, Strahilevitz J, Rahav G, Finn T, Miron D, et al. The herd  
423 effects of infant PCV7/PCV13 sequential implementation on adult invasive pneumococcal  
424 disease, six years post implementation; a nationwide study in Israel. *Vaccine*. 2017 Apr  
425 25;35(18):2449-56.
- 426 26. Ben-Shimol S, Greenberg D, Givon-Lavi N, Schlesinger Y, Somekh E, Aviner S, et al.  
427 Early impact of sequential introduction of 7-valent and 13-valent pneumococcal conjugate  
428 vaccine on IPD in Israeli children <5 years: an active prospective nationwide surveillance.  
429 *Vaccine*. 2014 Jun 5;32(27):3452-9.
- 430 27. Knol MJ, Wagenvoort GH, Sanders EA, Elberse K, Vlamincx BJ, de Melker HE, et al.  
431 Invasive Pneumococcal Disease 3 Years after Introduction of 10-Valent Pneumococcal  
432 Conjugate Vaccine, the Netherlands. *Emerging infectious diseases*. 2015 Nov;21(11):2040-  
433 4.
- 434 28. Ampofo K, Pavia AT, Chris S, Hersh AL, Bender JM, Blaschke AJ, et al. The changing  
435 epidemiology of invasive pneumococcal disease at a tertiary children's hospital through the  
436 7-valent pneumococcal conjugate vaccine era: a case for continuous surveillance. *The*  
437 *Pediatric infectious disease journal*. 2012 Mar;31(3):228-34.
- 438 29. Isaacman DJ, McIntosh ED, Reinert RR. Burden of invasive pneumococcal disease and  
439 serotype distribution among *Streptococcus pneumoniae* isolates in young children in  
440 Europe: impact of the 7-valent pneumococcal conjugate vaccine and considerations for  
441 future conjugate vaccines. *International journal of infectious diseases : IJID : official*  
442 *publication of the International Society for Infectious Diseases*. 2010 Mar;14(3):e197-209.
- 443 30. Sharma D, Baughman W, Holst A, Thomas S, Jackson D, da Gloria Carvalho M, et al.  
444 Pneumococcal carriage and invasive disease in children before introduction of the 13-  
445 valent conjugate vaccine: comparison with the era before 7-valent conjugate vaccine. *The*  
446 *Pediatric infectious disease journal*. 2013 Feb;32(2):e45-53.
- 447 31. Hammitt LL, Akech DO, Morpeth SC, Karani A, Kihuha N, Nyongesa S, et al. Population  
448 effect of 10-valent pneumococcal conjugate vaccine on nasopharyngeal carriage of  
449 *Streptococcus pneumoniae* and non-typeable *Haemophilus influenzae* in Kilifi, Kenya:



- 450 findings from cross-sectional carriage studies. *The Lancet Global health*. 2014  
451 Jul;2(7):e397-405.
- 452 32. Brueggemann AB, Peto TE, Crook DW, Butler JC, Kristinsson KG, Spratt BG. Temporal  
453 and geographic stability of the serogroup-specific invasive disease potential of  
454 *Streptococcus pneumoniae* in children. *The Journal of infectious diseases*. 2004 Oct  
455 1;190(7):1203-11.
- 456 33. Ahl J, Littorin N, Forsgren A, Odenholt I, Resman F, Riesbeck K. High incidence of septic  
457 shock caused by *Streptococcus pneumoniae* serotype 3--a retrospective epidemiological  
458 study. *BMC infectious diseases*. 2013 Oct 22;13:492.
- 459 34. Silva-Costa C, Brito MJ, Pinho MD, Friaes A, Aguiar SI, Ramirez M, et al. Pediatric  
460 Complicated Pneumonia Caused by *Streptococcus pneumoniae* Serotype 3 in 13-Valent  
461 Pneumococcal Conjugate Vaccines, Portugal, 2010-2015. *Emerging infectious diseases*.  
462 2018 Jul;24(7):1307-14.
- 463 35. Slotved HC, Dalby T, Harboe ZB, Valentiner-Branth P, Casadevante VF, Espenhain L, et  
464 al. The incidence of invasive pneumococcal serotype 3 disease in the Danish population is  
465 not reduced by PCV-13 vaccination. *Heliyon*. 2016 Nov;2(11):e00198.
- 466 36. Meichtry J, Born R, Kuffer M, Zwahlen M, Albrich WC, Brugger SD, et al. Serotype  
467 epidemiology of invasive pneumococcal disease in Swiss adults: a nationwide population-  
468 based study. *Vaccine*. 2014 Sep 08;32(40):5185-91.
- 469 37. Andrews NJ, Waight PA, Burbidge P, Pearce E, Roalfe L, Zancolli M, et al. Serotype-  
470 specific effectiveness and correlates of protection for the 13-valent pneumococcal  
471 conjugate vaccine: a postlicensure indirect cohort study. *The Lancet Infectious diseases*.  
472 2014 Sep;14(9):839-46.
- 473 38. Dagan R, Patterson S, Juergens C, Greenberg D, Givon-Lavi N, Porat N, et al.  
474 Comparative immunogenicity and efficacy of 13-valent and 7-valent pneumococcal  
475 conjugate vaccines in reducing nasopharyngeal colonization: a randomized double-blind  
476 trial. *Clinical infectious diseases : an official publication of the Infectious Diseases Society  
477 of America*. 2013 Oct;57(7):952-62.
- 478 39. Waight PA, Andrews NJ, Ladhani SN, Sheppard CL, Slack MP, Miller E. Effect of the 13-  
479 valent pneumococcal conjugate vaccine on invasive pneumococcal disease in England and  
480 Wales 4 years after its introduction: an observational cohort study. *The Lancet Infectious  
481 diseases*. 2015 May;15(5):535-43.
- 482 40. Bruce MG, Singleton R, Bulkow L, Rudolph K, Zulz T, Gounder P, et al. Impact of the 13-  
483 valent pneumococcal conjugate vaccine (pcv13) on invasive pneumococcal disease and  
484 carriage in Alaska. *Vaccine*. 2015 Sep 11;33(38):4813-9.

- 485 41. Huang SS, Platt R, Rifas-Shiman SL, Pelton SI, Goldmann D, Finkelstein JA. Post-PCV7  
486 changes in colonizing pneumococcal serotypes in 16 Massachusetts communities, 2001  
487 and 2004. *Pediatrics*. 2005 Sep;116(3):e408-13.
- 488 42. Weinberger DM, Malley R, Lipsitch M. Serotype replacement in disease after  
489 pneumococcal vaccination. *Lancet*. 2011 Dec 03;378(9807):1962-73.
- 490 43. Metcalf BJ, Gertz RE, Jr., Gladstone RA, Walker H, Sherwood LK, Jackson D, et al. Strain  
491 features and distributions in pneumococci from children with invasive disease before and  
492 after 13-valent conjugate vaccine implementation in the USA. *Clinical microbiology and  
493 infection : the official publication of the European Society of Clinical Microbiology and  
494 Infectious Diseases*. 2016 Jan;22(1):60 e9- e29.
- 495 44. Gladstone RA, Jefferies JM, Tocheva AS, Beard KR, Garley D, Chong WW, et al. Five  
496 winters of pneumococcal serotype replacement in UK carriage following PCV  
497 introduction. *Vaccine*. 2015 Apr 21;33(17):2015-21.
- 498 45. Flasche S, Van Hoek AJ, Sheasby E, Waight P, Andrews N, Sheppard C, et al. Effect of  
499 pneumococcal conjugate vaccination on serotype-specific carriage and invasive disease in  
500 England: a cross-sectional study. *PLoS medicine*. 2011 Apr;8(4):e1001017.
- 501 46. Huang SS, Hinrichsen VL, Stevenson AE, Rifas-Shiman SL, Kleinman K, Pelton SI, et al.  
502 Continued impact of pneumococcal conjugate vaccine on carriage in young children.  
503 *Pediatrics*. 2009 Jul;124(1):e1-11.
- 504 47. Kawaguchiya M, Urushibara N, Aung MS, Morimoto S, Ito M, Kudo K, et al. Emerging  
505 non-PCV13 serotypes of noninvasive *Streptococcus pneumoniae* with macrolide resistance  
506 genes in northern Japan. *New microbes and new infections*. 2016 Jan;9:66-72.
- 507 48. Lee H, Choi EH, Lee HJ. Efficacy and effectiveness of extended-valency pneumococcal  
508 conjugate vaccines. *Korean journal of pediatrics*. 2014 Feb;57(2):55-66.
- 509 49. Brandileone MC, Zanella RC, Almeida SCG, Brandao AP, Ribeiro AF, Carvalhanas TMP,  
510 et al. Effect of 10-valent pneumococcal conjugate vaccine on nasopharyngeal carriage of  
511 *Streptococcus pneumoniae* and *Haemophilus influenzae* among children in Sao Paulo,  
512 Brazil. *Vaccine*. 2016 Nov 4;34(46):5604-11.
- 513 50. Henriques-Normark B, Tuomanen EI. The pneumococcus: epidemiology, microbiology,  
514 and pathogenesis. *Cold Spring Harbor perspectives in medicine*. 2013 Jul 01;3(7).
- 515 51. Trzcinski K, Bogaert D, Wyllie A, Chu ML, van der Ende A, Bruin JP, et al. Superiority of  
516 trans-oral over trans-nasal sampling in detecting *Streptococcus pneumoniae* colonization in  
517 adults. *PloS one*. 2013;8(3):e60520.

- 518 52. Krone CL, Wyllie AL, van Beek J, Rots NY, Oja AE, Chu ML, et al. Carriage of  
519 Streptococcus pneumoniae in aged adults with influenza-like-illness. PloS one.  
520 2015;10(3):e0119875.
- 521 53. Wyllie AL, Rumke LW, Arp K, Bosch AA, Bruin JP, Rots NY, et al. Molecular  
522 surveillance on Streptococcus pneumoniae carriage in non-elderly adults; little evidence  
523 for pneumococcal circulation independent from the reservoir in children. Scientific reports.  
524 2016 Oct 7;6:34888.
- 525 54. Regev-Yochay G, Raz M, Dagan R, Porat N, Shainberg B, Pinco E, et al. Nasopharyngeal  
526 carriage of Streptococcus pneumoniae by adults and children in community and family  
527 settings. Clinical infectious diseases : an official publication of the Infectious Diseases  
528 Society of America. 2004 Mar 01;38(5):632-9.
- 529 55. Shak JR, Vidal JE, Klugman KP. Influence of bacterial interactions on pneumococcal  
530 colonization of the nasopharynx. Trends in microbiology. 2013 Mar;21(3):129-35.

**A** ■ VT10 ▨ 6A □ 19A ■ 3 □ non-VT13 **B** ■ VT10 ▨ 6A □ 19A ■ 3 □ non-VT13

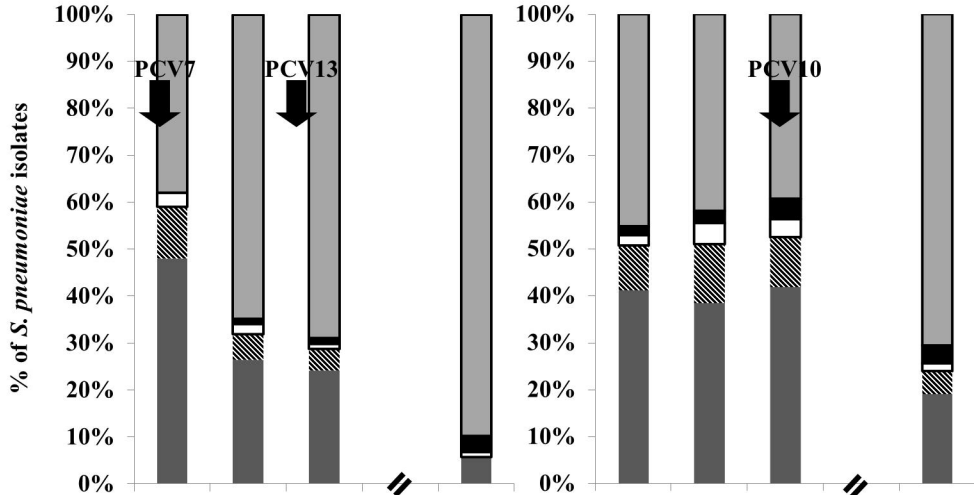

2009

2010

2011

2014

2009

2010

2011

2014

Total children (n) 345 311 324 287

Total carriers (n) 100 91 87 88

Sp-carriage (%) 29.0 29.3 26.9 30.7

620 595 556 643

223 200 160 184

36.0 33.6 28.8 28.6
